# Supplementary material for: A promising route for developing yellow long persistent luminescence and mechanoluminescence in CaGa2O4:Pr3+,Li+
Source: Royal Society of Chemistry journal article supplement (doi:10.1039/d1qi00326g), 2021-01-01
Supplement: d1qi00326g1.pdf [file d1qi00326g1.pdf]

## Supplementary Information

### A promising route for developing yellow long persistent luminescence and mechanoluminescence in $\text{CaGa}_2\text{O}_4:\text{Pr}^{3+},\text{Li}^+$

Yajie Wang <sup>a</sup>, Peng Feng <sup>a</sup>, SongSong Ding <sup>a</sup>, Songlu Tian <sup>a</sup>, Yuhua Wang <sup>\*a</sup>

Y. Wang, P. Feng, S. Ding, S. Tian, Prof. Y. Wang

<sup>a</sup> Key Laboratory for Special Function Materials and Structural Design of the Ministry of Education

National & Local Joint Engineering Laboratory for Optical Conversion Materials and Technology

School of Physical Science and Technology

Lanzhou University

Lanzhou, 730000, China.

E-mail: [wyh@lzu.edu.cn](mailto:wyh@lzu.edu.cn)

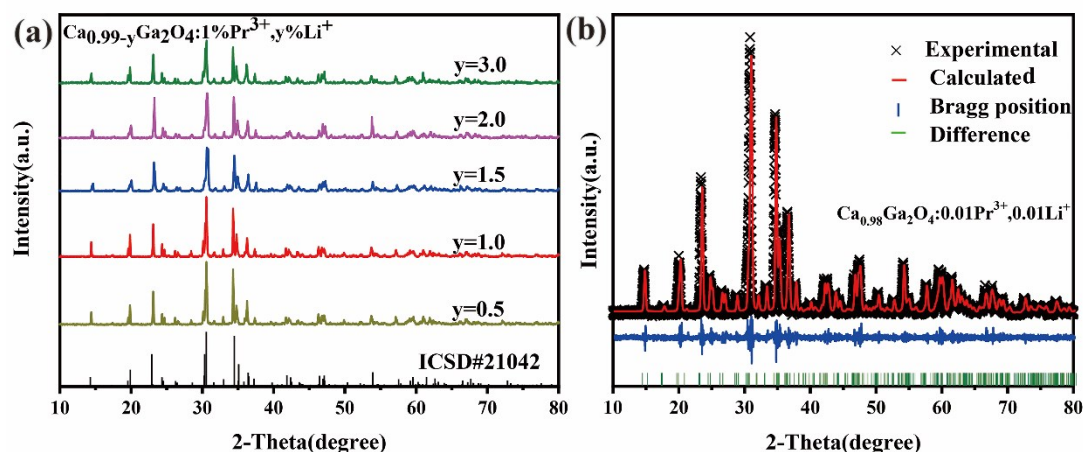

**Figure S1.** a) The XRD patterns of  $\text{CGO}:0.01\text{Pr}^{3+},y\text{Li}^+$  ( $0 \leq y \leq 0.03$ ). b) Rietveld refinement of  $\text{CGO}:0.01\text{Pr}^{3+}, 0.01\text{Li}^+$ .

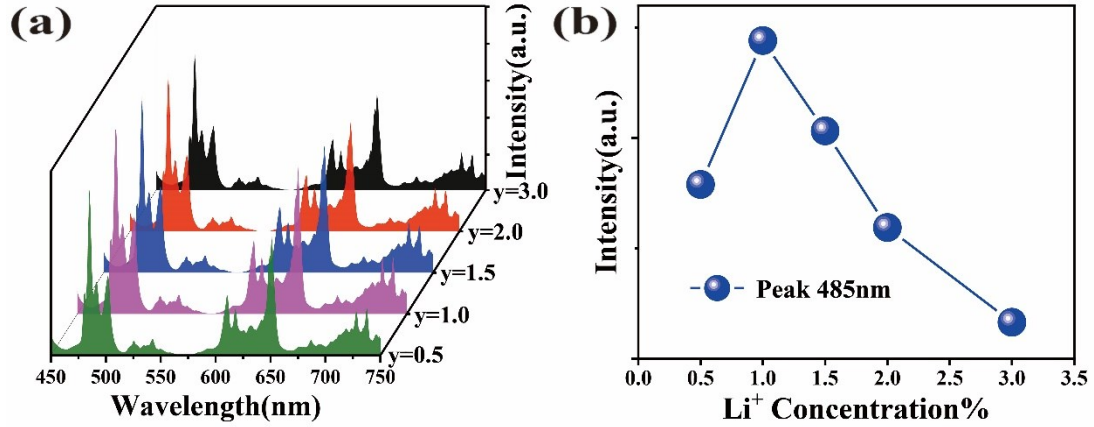

**Figure S2.** a) Emission spectra of CGO:0.01Pr<sup>3+</sup>,yLi<sup>+</sup> ( $0.5 \leq y \leq 0.03$ ),  $\lambda_{\text{ex}}=442\text{nm}$ . b) Peak intensity of 485nm of CGO:xPr<sup>3+</sup> ( $0.5 \leq y \leq 0.03$ ).

**Table S1.** Inductively Coupled Plasma Optical Emission Spectrometer (ICP-OES) results of CGO:0.01Pr<sup>3+</sup>,0.01Li<sup>+</sup>

| Sample                                        | Ca315.887 | Pr525.973 | Li670.791 | C <sub>Pr</sub> | C <sub>Li</sub> |
|-----------------------------------------------|-----------|-----------|-----------|-----------------|-----------------|
|                                               | mg/L      | mg/L      | mg/L      | at%             | at%             |
| CGO:0.01Pr <sup>3+</sup> ,0.01Li <sup>+</sup> | 876.7     | 29.74     | 1.022     | 0.95            | 0.68            |

**Table S2.** The fitting data of decay curves of CGO:0.01Pr<sup>3+</sup>

| Wavelength (nm) | A <sub>1</sub> | $\tau_1(\mu\text{s})$ | A <sub>2</sub> | $\tau_2(\mu\text{s})$ | $\tau^*(\mu\text{s})$ | R <sup>2</sup> |
|-----------------|----------------|-----------------------|----------------|-----------------------|-----------------------|----------------|
| 485             | 861.0          | 18.0                  | 33.2           | 310.1                 | 134.1                 | 0.99695        |
| 651             | 897.7          | 16.9                  | 24.4           | 193.5                 | 58.3                  | 0.99748        |

**Table S3.** CIE chromaticity coordinates of CGO:0.01Pr<sup>3+</sup>,0.01Li<sup>+</sup> as a function of delay time after irradiation by a 254 nm lamp for 3min.

| Delay time     | 30s           | 2min          | 5min          | 10min         | 15min         |
|----------------|---------------|---------------|---------------|---------------|---------------|
| CIE coordinate | (0.405,0.437) | (0.451,0.450) | (0.458,0.455) | (0.461,0.457) | (0.462,0.458) |

**Table S4.** CIE chromaticity coordinates of CGO:0.01Pr<sup>3+</sup>,yLi<sup>+</sup>( $0.005 \leq y \leq 0.03$ ) measured in the 2nd minute after irradiation by a 254 nm lamp for 3min.

| y              | 0.005         | 0.01          | 0.015         | 0.02          | 0.03          |
|----------------|---------------|---------------|---------------|---------------|---------------|
| CIE coordinate | (0.462,0.464) | (0.451,0.450) | (0.425,0.408) | (0.421,0.408) | (0.421,0.405) |
